# Supplementary material
Source: PubMed Central journal article supplement (PMC2147660)
Supplement: 1475-2883-2-S1-S2-S2.pdf [file 1475-2883-2-S1-S2-S2.pdf]

**Scientific Working Group on SAEs in *Loa loa* endemic areas**  
The Shrigley Hall Hotel, Manchester, UK  
28-30 May 2002

List of Participants

- Date:** 28-30 May 2002
- Venue:** Shrigley Hall Hotel, Manchester, UK
- Chair:** Professor M. Homeida
- Vice Chair:** Professor D. Molyneux
- Secretariat:** Dr. B. Thylefors & Dr. N. A. Y. Twum-Danso
- Rapporteurs:** Dr. D. Addiss, Dr. M. Bradley & Dr. K. Y. Dadzie
- Participants:** Dr. D. Addiss  
U.S. Centers for Disease Control and Prevention, Atlanta, USA
- Dr. K. Awadzi  
Onchocerciasis Chemotherapy Research Centre, Hohoe, Ghana
- Dr. R. Befidi-Mengue  
Sight Savers International, Yaoundé, Cameroun
- Dr. M. Boussinesq  
Institut de Recherche pour le Développement-Centre Pasteur du  
Cameroun, Yaoundé, Cameroun
- Dr. M. Bradley  
GlaxoSmithKline, London, UK
- Dr. K. Brown  
Independent consultant, Philadelphia, USA
- Dr. K. Y. Dadzie  
Technical Advisory Group for GPELF; also representing World Health  
Organization/Strategy  
Development and Monitoring for Eradication and Elimination, Geneva,  
Switzerland
- Dr. G. Edwards  
University of Liverpool, Liverpool, UK
- Ms. N. Haselow  
Hellen Keller International, Yaoundé, Cameroun
- Prof. M. Homeida  
Technical Consultative Committee/African Programme for Onchocerciasis  
Control; also representing Mectizan® Expert Committee and National  
Onchocerciasis Task Force, Khartoum, Sudan
- Dr. A. Hopkins  
Christoffel Blindenmission, Kinshasa, DRC
- Dr. J. Horton  
GlaxoSmithKline, London, UK

Dr. A. Klion  
National Institutes of Health, Bethesda, USA

Dr. V. Kumaraswami  
World Health Organization/Strategy Development and Monitoring for Eradication  
and Elimination,  
Geneva, Switzerland (unable to attend)

Prof. C. Mackenzie  
Michigan State University, Dimondale, USA

Prof. D. Molyneux  
Lymphatic Filariasis Support Centre, Liverpool, UK

Dr. H. Remme  
World Health Organization/Tropical Disease Research and Development, Geneva,  
Switzerland

Dr. F. Richards  
Global 2000 River blindness Program, Atlanta, USA

Dr. M. Taylor  
Liverpool School of Tropical Medicine, Liverpool, UK

Dr. M. Thomson  
Liverpool School of Tropical Medicine, Liverpool, UK (unable to attend)

Dr. B. Thylefors  
Mectizan® Donation Program, Atlanta, USA

Dr. N. A. Y. Twum-Danso  
Mectizan® Donation Program, Atlanta, USA
