# Supplementary material
Source: PubMed Central journal article supplement (PMC2147660)
Supplement: 1475-2883-2-S1-S2-S3.pdf [file 1475-2883-2-S1-S2-S3.pdf]

**Scientific Working Group on SAEs in *Loa loa* endemic areas**  
The Shrigley Hall Hotel, Manchester, UK  
28-30 May 2002

Terms of Reference:

- To review available information on SAEs reported in relation to Mectizan® treatment in Loa-endemic areas
- To identify needed information and ways to obtain it, with a view to the prevention and optimal management of SAEs
- To seek ways to implement needed research
